# Supplementary material for: Early-stage formation of (hydr)oxo bridges in transition-metal catalysts for photosynthetic processes
Source: Royal Society of Chemistry journal article supplement (doi:10.1039/d0cy02227f), 2020-12-22
Supplement: d0cy02227f1.pdf [file d0cy02227f1.pdf]

**Electronic Supplementary Information**

Early-stage formation of (hydr)oxo bridges in transition-metal catalysts for photosynthetic processes

Shin Nakamura,<sup>1</sup> Matteo Capone,<sup>2</sup> Giuseppe Mattioli,<sup>3\*</sup> and Leonardo Guidoni<sup>4</sup>

<sup>1</sup>*Department of Biochemical Sciences "A. Rossi Fanelli", Sapienza University of Rome, P.le A. Moro 5, 00185, Rome, Italy.*

<sup>2</sup>*Department of physical and chemical science, Università dell'Aquila, L'Aquila, 67100, Italy*

<sup>3</sup>*Istituto di Struttura della Materia del CNR (ISM-CNR), Area della Ricerca di Roma 1, I-00015 Monterotondo Scalo, Italy*

Table S1. Calculated effective potentials for each oxidation step [ $U(S_{i+1}-S_i)$  (V)] for isolated and two-metal systems of Co, Mn, and Ni at *pH* 7.0, 6.0, and 13.0, respectively.

| Transition            | Effective potential $U$ (V) |           |                     |           |                      |           |                                        |                                         |
|-----------------------|-----------------------------|-----------|---------------------|-----------|----------------------|-----------|----------------------------------------|-----------------------------------------|
|                       | Co ( <i>pH</i> 7.0)         |           | Mn ( <i>pH</i> 6.0) |           | Ni ( <i>pH</i> 13.0) |           |                                        | Two-metal<br>(less one H <sup>+</sup> ) |
|                       | Isolated                    | Two-metal | Isolated            | Two-metal | Isolated             | Two-metal | Isolated<br>(less one H <sup>+</sup> ) |                                         |
| $S_0 \rightarrow S_1$ | 1.60                        | 1.29      | 1.12                | 0.80      | 1.79                 | 1.83      | 1.03                                   | 1.27                                    |
| $S_1 \rightarrow S_2$ | 1.63                        | 1.39      | 1.85                | 0.85      | 1.45                 | 1.41      |                                        | 1.38                                    |
| $S_2 \rightarrow S_3$ |                             |           |                     | 1.52      |                      | 1.97      |                                        | 1.64                                    |
| $S_3 \rightarrow S_4$ |                             |           |                     | 1.62      |                      | 1.46      |                                        |                                         |
